# Supplementary material for: Crystal structure and carrier transport properties of a new 3D mixed-valence Cu(i)–Cu(ii) coordination polymer including pyrrolidine dithiocarbamate ligand
Source: Royal Society of Chemistry journal article supplement (doi:10.1039/c0dt01065k), 2010-12-22
Supplement: c0dt01065k.pdf [file c0dt01065k.pdf]

**Supporting information**

**Crystal Structure and Carrier Transport Properties of a New  
3D Mixed-Valence Cu(I)-Cu(II) Coordination Polymer  
Including Pyrrolidine Dithiocarbamate Ligand**

Takashi Okubo,<sup>\*a,c</sup> Naoya Tanaka,<sup>a</sup> Kyung Ho Kim,<sup>a</sup> Haruho Anma,<sup>a</sup> Shu Seki,<sup>b,c</sup> Akinori Saeki,<sup>b</sup> Masahiko Maekawa<sup>a</sup> and Takayoshi Kuroda-Sowa<sup>\*a</sup>

<sup>a</sup> *Kinki University, 3-4-1 Kowakae, Higashi-Osaka-shi, Osaka 577-8502, Japan. Fax: +81-6-6723-2721; Tel: +81-6-6730-5880 (ex. 4117); E-mail: okubo\_t@chem.kindai.ac.jp*

<sup>b</sup> *Department of Applied Chemistry, Osaka University, 2-1 Yamadaoka, Suita, Osaka 565-0871, Japan.*

<sup>c</sup> *PRESTO, Japan Science and Technology Agency (JST).*

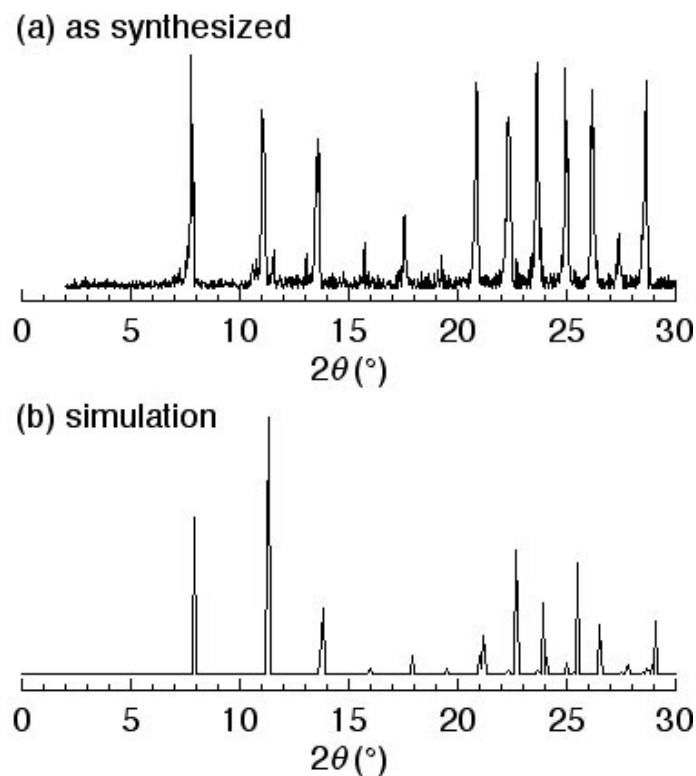

Figure S1. Comparison of XRPD patterns of product **1** (a) with the respective calculated ones (b) from the single-crystal data.

Table S1. Estimated parameters ( $R_1$ ,  $C_1$ ,  $R_2$ ,  $C_2$ ,  $R_3$ ,  $CPE_{3-A}$  and  $CPE_{3-\alpha}$ ) by the fittings to the impedance data of **1** at different temperatures with the equivalent circuit in the inset of Figure 6 using ZView software, where  $R_1$ ,  $R_2$  and  $R_3$  are the resistances,  $CPE_{3-A}$  is the parameter concerned with the capacitance, and  $CPE_{3-\alpha}$  is corresponding to the dispersion of the relaxation time of the electrode interface, respectively; the CPE impedance is given by the relationship:  $Z_{CPE} = 1/[A(j\omega)^\alpha]$ , and for  $\alpha = 1$  the CPE describes an ideal capacitor ( $A = C$ ).

| $T$ (K) | $R_1$ ( $\Omega$ ) | $C_1$ (F) | $R_2$ ( $\Omega$ ) | $C_2$ (F) | $R_3$ ( $\Omega$ ) | $CPE_{3-A}$ | $CPE_{3-a}$ | $\chi^2$  |
|---------|--------------------|-----------|--------------------|-----------|--------------------|-------------|-------------|-----------|
| 250     | 3.59E+05           | 5.24E-11  | 1.82E+06           | 7.18E-11  | 1.80E+08           | 3.88E-11    | 0.97654     | 0.002277  |
| 255     | 3.33E+05           | 4.73E-11  | 1.65E+06           | 7.84E-11  | 1.93E+08           | 4.16E-11    | 0.9738      | 0.0019584 |
| 260     | 2.35E+05           | 4.80E-11  | 1.16E+06           | 8.05E-11  | 1.56E+08           | 4.48E-11    | 0.96724     | 0.001954  |

|     |          |          |          |          |          |          |         |            |
|-----|----------|----------|----------|----------|----------|----------|---------|------------|
| 265 | 2.05E+05 | 4.69E-11 | 9.49E+05 | 9.05E-11 | 1.64E+08 | 4.86E-11 | 0.96142 | 0.0016443  |
| 270 | 1.59E+05 | 4.94E-11 | 6.54E+05 | 1.04E-10 | 1.34E+08 | 5.41E-11 | 0.95008 | 0.0011515  |
| 275 | 1.25E+05 | 4.91E-11 | 5.14E+05 | 1.09E-10 | 1.04E+08 | 5.73E-11 | 0.94643 | 0.0011083  |
| 280 | 1.04E+05 | 4.87E-11 | 4.32E+05 | 1.19E-10 | 9.28E+07 | 6.20E-11 | 0.94117 | 0.0017478  |
| 285 | 78234    | 5.11E-11 | 3.03E+05 | 1.33E-10 | 8.41E+07 | 6.87E-11 | 0.93136 | 0.0013741  |
| 290 | 60215    | 5.44E-11 | 2.11E+05 | 1.53E-10 | 7.37E+07 | 7.56E-11 | 0.92229 | 0.00096505 |
| 295 | 47979    | 5.72E-11 | 1.55E+05 | 1.83E-10 | 6.33E+07 | 8.48E-11 | 0.91238 | 0.0012443  |
| 300 | 40506    | 5.79E-11 | 1.39E+05 | 2.07E-10 | 5.61E+07 | 9.17E-11 | 0.90762 | 0.0011505  |

Table S2. Calculated electric conductivity  $\sigma$  and dielectric constant  $\epsilon'$  from the parameters in Table S1 by using the following relationships:  $\sigma = 1/R \times d/S$  and  $\epsilon' \approx A/\epsilon_0 \times d/S$ , where  $d$  is the thickness of the pellet sample,  $S$  is the electrode area and  $\epsilon_0$  is the permittivity of vacuum,  $8.855 \times 10^{-12}$  F/m. The  $\sigma_1$  and  $\sigma_2$  values are corresponding to the electric conductivity of the bulk sample and grain boundary of **1**, respectively.

|     | $\sigma_1$ (S cm <sup>-1</sup> ) | $\epsilon_1$ | $\sigma_2$ (S cm <sup>-1</sup> ) | $\epsilon_2$ |
|-----|----------------------------------|--------------|----------------------------------|--------------|
| 250 | 5.90E-08                         | 12.541       | 1.16E-08                         | 17.165       |
| 255 | 6.36E-08                         | 11.314       | 1.29E-08                         | 18.753       |
| 260 | 9.03E-08                         | 11.489       | 1.82E-08                         | 19.26        |
| 265 | 1.04E-07                         | 11.221       | 2.23E-08                         | 21.65        |
| 270 | 1.34E-07                         | 11.809       | 3.24E-08                         | 24.972       |
| 275 | 1.69E-07                         | 11.742       | 4.12E-08                         | 26.145       |
| 280 | 2.04E-07                         | 11.644       | 4.90E-08                         | 28.537       |
| 285 | 2.71E-07                         | 12.221       | 6.98E-08                         | 31.718       |
| 290 | 3.52E-07                         | 13.01        | 1.00E-07                         | 36.598       |
| 295 | 4.41E-07                         | 13.692       | 1.37E-07                         | 43.869       |
| 300 | 5.23E-07                         | 13.85        | 1.53E-07                         | 49.538       |

Table S3. Crystal Data and Structure Refinement Parameters for **1**.

Empirical Formula

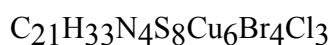

|                                                  |                                                                                               |
|--------------------------------------------------|-----------------------------------------------------------------------------------------------|
| Formula Weight                                   | 1405.25                                                                                       |
| Crystal System                                   | tetragonal                                                                                    |
| Lattice Parameters                               | $a = 15.6452(5) \text{ \AA}$<br>$c = 15.9953(6) \text{ \AA}$<br>$V = 3915.2(2) \text{ \AA}^3$ |
| Space Group                                      | I4 <sub>1</sub> /a (#88)                                                                      |
| Z value                                          | 4                                                                                             |
| $D_{\text{calc}}$                                | 2.384 g/cm <sup>3</sup>                                                                       |
| $F_{000}$                                        | 2720.00                                                                                       |
| $\mu(\text{MoK}\alpha)$                          | 79.515 cm <sup>-1</sup>                                                                       |
| No. Observations (All reflections)               | 2236                                                                                          |
| No. Variables                                    | 109                                                                                           |
| Reflection/Parameter Ratio                       | 20.51                                                                                         |
| Residuals: $R_1 (I > 2.00 \sigma(I))^a$          | 0.0365                                                                                        |
| Residuals: $R$ (All reflections)                 | 0.0385                                                                                        |
| Residuals: $wR_2$ (All reflections) <sup>b</sup> | 0.0872                                                                                        |
| Goodness of Fit Indicator                        | 1.045                                                                                         |
| Max Shift/Error in Final Cycle                   | 0.002                                                                                         |
| Maximum peak in Final Diff. Map                  | 2.78 e/ $\text{\AA}^3$                                                                        |
| Minimum peak in Final Diff. Map                  | -2.04 e/ $\text{\AA}^3$                                                                       |

---


$$^a R_1 = \frac{\sum ||F_o| - |F_c||}{\sum |F_o|}$$

$$^b wR_2 = [\sum w(F_o^2 - F_c^2)^2 / \sum w(F_o^2)^2]^{1/2}$$

Table S4. Atomic coordinates and  $B_{\text{iso}}/B_{\text{eq}}$  and occupancy for **1**.

| atom | x          | y           | z           | $B_{\text{eq}}$ | occ |
|------|------------|-------------|-------------|-----------------|-----|
| Br1  | 0.22059(2) | 0.52393(3)  | 0.00067(3)  | 1.445(9)        |     |
| Cu1  | 0.5000     | 0.5000      | 0.0000      | 1.181(12)       | 1/2 |
| Cu2  | 0.30162(3) | 0.53620(3)  | 0.13061(3)  | 1.364(11)       |     |
| Cl1  | 0.9235(2)  | 0.32420(19) | 0.08138(19) | 7.54(9)         | 3/4 |
| S1   | 0.57147(6) | 0.58857(6)  | 0.09172(6)  | 1.333(16)       |     |
| S2   | 0.43655(6) | 0.46530(6)  | 0.12531(6)  | 1.230(15)       |     |
| N1   | 0.5064(2)  | 0.5628(2)   | 0.2450(2)   | 1.30(5)         |     |

|    |           |           |           |         |     |
|----|-----------|-----------|-----------|---------|-----|
| C1 | 0.5059(2) | 0.5416(2) | 0.1667(2) | 1.17(5) |     |
| C2 | 0.5603(2) | 0.6318(2) | 0.2811(2) | 1.59(6) |     |
| C3 | 0.5296(3) | 0.6373(3) | 0.3714(3) | 2.25(7) |     |
| C4 | 0.4982(3) | 0.5471(3) | 0.3906(2) | 2.25(8) |     |
| C5 | 0.4536(2) | 0.5210(3) | 0.3101(2) | 1.73(6) |     |
| C6 | 1.0000    | 0.2500    | 0.1250    | 10.5(7) | 1/4 |

$$B_{eq} = 8/3 \pi^2 (U_{11}(aa^*)^2 + U_{22}(bb^*)^2 + U_{33}(cc^*)^2 + 2U_{12}(aa^*bb^*)\cos \gamma + 2U_{13}(aa^*cc^*)\cos \beta + 2U_{23}(bb^*cc^*)\cos \alpha)$$

Table S5. Anisotropic displacement parameters for **1**.

| atom | U <sub>11</sub> | U <sub>22</sub> | U <sub>33</sub> | U <sub>12</sub> | U <sub>13</sub> | U <sub>23</sub> |
|------|-----------------|-----------------|-----------------|-----------------|-----------------|-----------------|
| Br1  | 0.0151(2)       | 0.0205(2)       | 0.0193(2)       | 0.00190(14)     | -0.00176(14)    | -0.00510(15)    |
| Cu1  | 0.0124(3)       | 0.0158(3)       | 0.0167(3)       | 0.0007(2)       | 0.0008(2)       | 0.0009(2)       |
| Cu2  | 0.0173(2)       | 0.0166(2)       | 0.0179(2)       | -0.00086(18)    | -0.00034(19)    | -0.00068(19)    |
| Cl1  | 0.174(3)        | 0.0541(15)      | 0.0581(16)      | -0.0517(19)     | -0.0107(19)     | 0.0012(12)      |
| S1   | 0.0130(4)       | 0.0191(4)       | 0.0186(4)       | -0.0019(3)      | -0.0003(3)      | 0.0031(3)       |
| S2   | 0.0141(4)       | 0.0144(4)       | 0.0182(4)       | -0.0010(3)      | 0.0017(3)       | -0.0012(3)      |
| N1   | 0.0131(15)      | 0.0160(16)      | 0.0202(17)      | 0.0009(12)      | -0.0001(12)     | 0.0006(13)      |
| C1   | 0.0107(16)      | 0.0134(17)      | 0.0204(19)      | 0.0012(13)      | -0.0009(14)     | 0.0010(14)      |
| C2   | 0.0171(19)      | 0.0165(18)      | 0.027(2)        | -0.0016(14)     | -0.0011(16)     | -0.0034(16)     |
| C3   | 0.024(2)        | 0.034(2)        | 0.028(2)        | -0.0063(18)     | 0.0026(18)      | -0.011(2)       |
| C4   | 0.027(2)        | 0.040(2)        | 0.019(2)        | -0.009(2)       | 0.0014(17)      | -0.0039(19)     |
| C5   | 0.0186(19)      | 0.028(2)        | 0.019(2)        | -0.0061(16)     | 0.0020(16)      | -0.0001(17)     |
| C6   | 0.083(9)        | 0.083(9)        | 0.23(3)         | 0.0000          | 0.0000          | 0.0000          |

The general temperature factor expression:  $\exp(-2\pi^2(a^2U_{11}h^2 + b^2U_{22}k^2 + c^2U_{33}l^2 + 2a^*b^*U_{12}hk + 2a^*c^*U_{13}hl + 2b^*c^*U_{23}kl))$

Table S6. Bond lengths (Å) of **1**.

| atom | atom             | distance   | atom | atom              | distance   |
|------|------------------|------------|------|-------------------|------------|
| Br1  | Cu2              | 2.4421(6)  | Br1  | Cu2 <sup>1)</sup> | 2.4776(6)  |
| Cu1  | S1               | 2.3071(9)  | Cu1  | S1 <sup>2)</sup>  | 2.3071(9)  |
| Cu1  | S2               | 2.3017(9)  | Cu1  | S2 <sup>2)</sup>  | 2.3017(9)  |
| Cu2  | S1 <sup>3)</sup> | 2.3428(10) | Cu2  | S2                | 2.3862(10) |
| Cl1  | C6               | 1.807(3)   | S1   | C1                | 1.741(4)   |
| S2   | C1               | 1.744(3)   | N1   | C1                | 1.295(5)   |
| N1   | C2               | 1.486(5)   | N1   | C5                | 1.482(5)   |
| C2   | C3               | 1.525(6)   | C3   | C4                | 1.526(7)   |
| C4   | C5               | 1.520(6)   |      |                   |            |

Symmetry Operators:

(1) Y+3/4-1,-X+3/4,Z+3/4-1  
(3) Y+3/4-1,-X+1/4+1,-Z+1/4

(2) -X+1,-Y+1,-Z

Table S7. Bond angles (°) of **1**.

|                   |      |                   |            |                   |      |                   |            |
|-------------------|------|-------------------|------------|-------------------|------|-------------------|------------|
| atom              | atom | atom              | angle      | atom              | atom | atom              | angle      |
| Cu2               | Br1  | Cu2 <sup>1)</sup> | 118.82(2)  | S1                | Cu1  | S1 <sup>2)</sup>  | 180.00(4)  |
| S1                | Cu1  | S2                | 78.28(3)   | S1                | Cu1  | S2 <sup>2)</sup>  | 101.72(3)  |
| S1 <sup>2)</sup>  | Cu1  | S2                | 101.72(3)  | S1 <sup>2)</sup>  | Cu1  | S2 <sup>2)</sup>  | 78.28(3)   |
| S2                | Cu1  | S2 <sup>2)</sup>  | 180.00(4)  | Br1               | Cu2  | Br1 <sup>3)</sup> | 112.30(2)  |
| Br1               | Cu2  | S1 <sup>4)</sup>  | 111.32(3)  | Br1               | Cu2  | S2                | 113.11(3)  |
| Br1 <sup>3)</sup> | Cu2  | S1 <sup>4)</sup>  | 111.41(3)  | Br1 <sup>3)</sup> | Cu2  | S2                | 104.89(3)  |
| S1 <sup>4)</sup>  | Cu2  | S2                | 103.31(3)  | Cu1               | S1   | Cu2 <sup>5)</sup> | 115.63(4)  |
| Cu1               | S1   | C1                | 84.20(13)  | Cu2 <sup>5)</sup> | S1   | C1                | 109.03(13) |
| Cu1               | S2   | Cu2               | 107.63(3)  | Cu1               | S2   | C1                | 84.30(13)  |
| Cu2               | S2   | C1                | 102.62(13) | C1                | N1   | C2                | 124.5(3)   |
| C1                | N1   | C5                | 124.2(3)   | C2                | N1   | C5                | 111.3(3)   |
| S1                | C1   | S2                | 113.2(2)   | S1                | C1   | N1                | 123.6(2)   |
| S2                | C1   | N1                | 123.1(3)   | N1                | C2   | C3                | 103.4(3)   |
| C2                | C3   | C4                | 103.8(3)   | C3                | C4   | C5                | 103.1(3)   |
| N1                | C5   | C4                | 102.7(3)   | Cl1               | C6   | Cl1 <sup>6)</sup> | 98.57(15)  |
| Cl1               | C6   | Cl1 <sup>7)</sup> | 134.58(14) | Cl1               | C6   | Cl1 <sup>8)</sup> | 98.57(17)  |
| Cl1 <sup>6)</sup> | C6   | Cl1 <sup>7)</sup> | 98.57(17)  | Cl1 <sup>6)</sup> | C6   | Cl1 <sup>8)</sup> | 134.58(14) |
| Cl1 <sup>7)</sup> | C6   | Cl1 <sup>8)</sup> | 98.57(15)  |                   |      |                   |            |

Symmetry Operators:

- |     |                            |     |                             |
|-----|----------------------------|-----|-----------------------------|
| (1) | $Y+3/4-1, -X+3/4, Z+3/4-1$ | (2) | $-X+1, -Y+1, -Z$            |
| (3) | $-Y+3/4, X+1/4, Z+1/4$     | (4) | $Y+3/4-1, -X+1/4+1, -Z+1/4$ |
| (5) | $-Y+1/4+1, X+1/4, -Z+1/4$  | (6) | $Y+3/4, -X+1/4+1, -Z+1/4$   |
| (7) | $-X+2, -Y+1/2, Z$          | (8) | $-Y+1/4+1, X+1/4-1, -Z+1/4$ |
